# Supplementary material
Source: publisher figshare collection journal article supplement (https://microbiology.figshare.com/ndownloader/files/20065589)
Supplement: Supplementary file 1 [file 20065589]

## Sheet: Table S6
Sample	Raw Megabases	% DENV DNA	CDS Assembly	Serotype	Genotype
SRR3539340	330365175	83.7	consensus	I	1
SRR3539341	317977866	66.56	consensus	I	1
SRR3539342	406075245	74.2	consensus	I	1
SRR3539343	302220886	59.24	de novo	I	1
SRR3539344	424801129	83.21	de novo	I	1
SRR3539345	345821429	92.58	de novo	I	1
SRR3539346	411918039	90.92	de novo	I	1
SRR3539347	411031278	90.92	de novo	I	1
SRR3539348	469139944	92.45	de novo	I	1
SRR3539349	537372466	90.77	de novo	I	1
SRR3539350	401844325	90.32	de novo	I	1
SRR3539351	401993816	89.76	de novo	I	1
SRR3539352	357846693	88.48	consensus	I	1
SRR3539353	412322289	82.94	de novo	I	1
SRR3539354	398022772	86.07	consensus	I	1
SRR3539355	388552807	92.43	consensus	I	1
SRR3539357	351745878	88.51	consensus	I	1
SRR3539358	398098393	70.74	de novo	I	1
SRR3539359	479640173	91.59	consensus	I	1
SRR3539360	374570187	75.78	de novo	I	1
SRR3539361	370202077	72.56	de novo	I	1
SRR3539362	402201658	83.22	consensus	I	1
SRR3539363	467055595	75.85	consensus	I	1
SRR3539364	312321789	65.93	de novo	I	1
SRR3539365	253871159	88.37	de novo	I	1
SRR3539366	246292055	82.12	consensus	I	1
SRR3539367	228721211	86.98	de novo	I	1
SRR3539368	253255975	89.84	de novo	I	1
SRR3539369	254904463	91.39	de novo	I	1
SRR3539370	256094646	89.77	de novo	I	1
SRR3539371	266981417	93.77	de novo	I	1
SRR3539372	195098066	82.5	consensus	I	1
SRR3539373	237636237	84.54	consensus	I	1
SRR3539374	202624880	91.98	de novo	I	1
SRR3539375	399641302	87.95	consensus	I	1
SRR3539376	209424800	92.58	de novo	I	1
SRR3539377	278160288	89.75	de novo	I	1
SRR3539378	328706147	87.33	de novo	I	1
SRR3539379	370640534	88.93	de novo	I	1
SRR3539380	313475971	66.56	de novo	I	1
SRR3539381	327213068	89.39	de novo	I	1
SRR3539382	295317021	78.49	de novo	I	1
SRR3539383	335941236	81.98	consensus	I	1
SRR3539384	383785104	90.79	de novo	I	1
SRR3539385	330006204	88.86	de novo	I	1
SRR3539386	454412182	87.3	de novo	I	1
SRR3539387	321847824	92.31	de novo	I	1
SRR3539388	354652844	92.31	de novo	I	1
SRR3539389	345354321	88.38	consensus	I	1
SRR3539390	412365081	84.83	de novo	I	1
SRR3539391	374367976	84.5	de novo	I	1
SRR3539393	428999734	82.5	de novo	I	1
SRR3539394	323218873	91.91	de novo	I	1
SRR3539395	375283202	91.7	de novo	I	1
SRR3539396	434756338	84.96	de novo	I	1
SRR3539397	361928373	93.07	de novo	I	1
SRR3539398	462599218	80.7	consensus	I	1
SRR3539399	379115053	86.74	de novo	I	1
SRR3539400	404747525	93.34	consensus	I	1
SRR3539401	327849624	94.64	consensus	I	1
SRR3539406	209992112	78.25	de novo	I	1
SRR3539407	370290249	91.86	consensus	I	1
SRR3539408	191269315	95.58	de novo	I	1
SRR3539409	398058055	91.69	de novo	I	1
SRR3539410	393229460	94.48	de novo	I	1
SRR3539411	387469496	93.21	consensus	I	1
SRR3539412	53752250	82.32	de novo	I	1
SRR3539413	347547808	85.47	de novo	I	1
SRR3539414	355980530	84.16	consensus	I	1
SRR3539415	364109410	92.25	consensus	I	1
SRR3539416	341121914	86.11	consensus	I	1
SRR3539417	339098553	84.5	de novo	I	1
SRR3539418	332640627	85.66	de novo	I	1
SRR3539419	360466242	85.65	de novo	I	1
SRR3539420	415554748	84.23	de novo	I	1
SRR3539421	322411348	93.42	de novo	I	1
SRR3539422	387614239	82.17	consensus	I	1
SRR3539424	446656613	84.25	de novo	I	1
